# Supplementary material
Source: PubMed Central journal article supplement (PMC1559977)
Supplement: rspb20053249s03.pdf [file rspb20053249s03.pdf]

# ELECTRONIC APPENDIX

This is the Electronic Appendix to the article

60 million years of co-divergence in the fig-wasp symbiosis

by

Nina Rønsted, George D. Weiblen, James M. Cook, Nicolas Salamin,  
Carlos A. Machado & Vincent Savolainen

*Proc. R. Soc. B* ([doi:10.1098/rspb.2005.3249](https://doi.org/10.1098/rspb.2005.3249))

Electronic appendices are refereed with the text; however, no attempt is made  
to impose a uniform editorial style on the electronic appendices.

**Table 1. Voucher information and GenBank accession numbers of material included in the study.**

| TAXA                                              | VOUCHER INFORMATION | ORIGIN          | ITS                    | ETS                    |
|---------------------------------------------------|---------------------|-----------------|------------------------|------------------------|
| <i>Ficus</i> L.                                   |                     |                 |                        |                        |
| Subgenus <i>Pharmacosycea</i> (Miq.)              |                     |                 |                        |                        |
| Miq.                                              |                     |                 |                        |                        |
| Section <i>Pharmacosycea</i> .                    |                     |                 |                        |                        |
| <i>F. insipida</i> Willd. ssp. <i>insipida</i>    |                     |                 | Jousselin et al. 2003. | Jousselin et al. 2003. |
| (= <i>F. glabrata</i> Kunth.).                    |                     |                 |                        |                        |
| <i>F. insipida</i> Willd.                         |                     |                 | Weiblen 2000.          | Jousselin et al. 2003. |
| <i>F. tonduzii</i> Standl. (= <i>F. macrocyce</i> | FB/S3752 (BR).      | Liv. col. (BR). | AY730140               | AY730230               |
| Pittier).                                         |                     |                 |                        |                        |
| <i>F. maxima</i> Mill.                            |                     |                 | Weiblen 2000.          | Jousselin et al. 2003. |
| <i>F. yoponensis</i> Desvaux.                     |                     |                 | Jousselin et al. 2003. | Jousselin et al. 2003. |
| Section <i>Oreosycea</i> (Miq.) Corner            |                     |                 |                        |                        |

|                                                                              |                            |                              |                        |                        |
|------------------------------------------------------------------------------|----------------------------|------------------------------|------------------------|------------------------|
| <i>F. callosa</i> Willd.                                                     |                            |                              | Jousselin et al. 2003. | Jousselin et al. 2003. |
| <i>F. edelfeltii</i> King                                                    | GW821 (MIN).               | New Guinea                   | Weiblen 2000.          | AY730209               |
| <i>F. hombroniana</i> Corner                                                 |                            |                              | Weiblen 2000.          | -                      |
| <i>F. subtrinervia</i> Laut. et K. Schum.<br>(= <i>F. pachystemon</i> Warb). | Takeuchi et al. 15210 (K). | New Guinea                   | AY730119               | -                      |
| <i>F. racemigera</i> Bur.                                                    |                            |                              |                        | Jousselin et al. 2003. |
| Subgenus <i>Urostigma</i> (Gasp.) Miq.                                       |                            |                              |                        |                        |
| Section <i>Urostigma</i>                                                     |                            |                              |                        |                        |
| <i>F. concinna</i> (Miq.) Miq.                                               | Rønsted 178 (AU).          | Songkhla, Thailand.          | AY730059               | AY730145               |
| <i>F. cordata</i> Thunb. subsp. <i>salicifolia</i><br>(Vahl). C.C. Berg.     | Forest 329 (NBG).          | Liv. col. (NBG). 167/46      | AY730060               | AY730146               |
| <i>F. cordata</i> Thunb. subsp. <i>salicifolia</i><br>(Vahl). C.C. Berg.     |                            |                              |                        | Jousselin et al. 2003. |
| <i>F. ingens</i> (Miq.) Miq.                                                 | Rønsted 106 (K).           | Liv. col. (BG). Berg 91.839. | AY730061               | AY730147               |

|                                         |                                |                              |                        |                        |
|-----------------------------------------|--------------------------------|------------------------------|------------------------|------------------------|
| <i>F. lacor</i> Buch. Ham.              | Rønsted 64 (C).                | Liv. col. (C). E1859-0012.   | AY730062               | AY730148               |
| <i>F. prolixa</i> Forst. f.             |                                |                              | Jousselin et al. 2003. | Jousselin et al. 2003. |
| <i>F. religiosa</i> L.                  |                                |                              | Jousselin et al. 2003. | Jousselin et al. 2003. |
| <i>F. superba</i> Miq.                  | Rønsted 63 (C).                | Liv. col. (C). S1864-0160.   | Weiblen 2000.          | AY730149               |
| <i>F. virens</i> Ait.                   | Rønsted 137 (K).               | Liv. col. (BG). Berg 89.536. | Weiblen 2000.          | AY730150               |
| Section <i>Conosycea</i> (Miq.) Corner. |                                |                              |                        |                        |
| <i>F. altissima</i> Bl.                 | Rønsted 69 (C).                | Liv. col. (C). S1897-0083.   | AY730064               | AY730152               |
| <i>F. benghalensis</i> L.               | HTS 1490 (TBGT/C).             | Rajastahn, India.            | AY730065               | AY730153               |
| <i>F. benjamina</i> L.                  |                                |                              | Jousselin et al. 2003. | Jousselin et al. 2003. |
| <i>F. binnendykii</i> Miq.              |                                |                              | Jousselin et al. 2003. | Jousselin et al. 2003. |
| <i>F. consociata</i> Bl.                |                                |                              | Jousselin et al. 2003. | Jousselin et al. 2003. |
| <i>F. drupacea</i> Thunb.               | Rønsted 114 (K).               | Liv. col. (BG). Berg 92.755. | AY730066               | AY730154               |
| <i>F. menabeensis</i> H. Per.           | Miller & Radrinasolo 6266 (K). | Ambalavao, Madagascar.       | AY730067               | AY730155               |
| <i>F. microcarpa</i> L.                 |                                |                              | Weiblen 2000.          | Jousselin et al. 2003. |

|                                                                    |                               |                              |                        |                        |                        |
|--------------------------------------------------------------------|-------------------------------|------------------------------|------------------------|------------------------|------------------------|
| <i>F. subgelderi</i> Corner.                                       |                               |                              |                        | Jousselin et al. 2003. | Jousselin et al. 2003. |
| <i>F. sundaica</i> Bl.                                             | GW906 (MIN).                  | Liv. col. (MIN).             | AY730068               | AY730156               |                        |
| <i>F. xylophylla</i> Wall. ex. Miq.                                |                               |                              | Jousselin et al. 2003. | Jousselin et al. 2003. |                        |
| Section <i>Leucogyne</i> Corner.                                   |                               |                              |                        |                        |                        |
| <i>F. rumphii</i> Bl.                                              | Rønsted 74 (C).               | Liv. Col. (C).               | AY730063               | AY730151               |                        |
| Section <i>Malvanthera</i> Corner.                                 |                               |                              |                        |                        |                        |
| <i>F. atricha</i> D.J. Dixon<br>(= <i>F. platypoda</i> Miq.)       | Rønsted 142 (K).              | Liv. col. (BG). Berg 93.220. | AY730116               | AY730206               |                        |
| <i>F. crassipes</i> F. M. Bailey.                                  | JMC2                          | Queensland, Australia.       | AY730112               | AY730201               |                        |
| <i>F. glandifera</i> Summerh.                                      | Wheatley 297 (K).             | Vanuatu.                     | AY730113               | AY730202               |                        |
| <i>F. hesperidiformis</i> King.                                    | Henty & Foreman NGF42554 (K). | New Guinea.                  | Weiblen 2000.          | AY730203               |                        |
| <i>F. macrophylla</i> Desf. ex. Pers.<br>subsp. <i>macrophylla</i> |                               |                              | Jousselin et al. 2003. | Jousselin et al. 2003. |                        |

|                                                                                |                              |                                 |                        |                        |
|--------------------------------------------------------------------------------|------------------------------|---------------------------------|------------------------|------------------------|
| <i>F. macrophylla</i> Desf. ex. Pers.                                          | Savolainen and Baker.        | Lord Howii Island.              | AY730115               | AY730205               |
| subsp. <i>columnaris</i> (C. Morre)                                            |                              |                                 |                        |                        |
| P.S.Green.                                                                     |                              |                                 |                        |                        |
| <i>F. platypoda</i> (Miq.) A. Cunn. ex. Miq. (= <i>F. leuchostricha</i> Miq.). | Jacobs & Wilson 5665 (K).    | Australia.                      | AY730114               | AY730204               |
| <i>F. pleurocarpa</i> F. v. M.                                                 |                              |                                 | Jousselin et al. 2003. | Jousselin et al. 2003. |
| <i>F. rubiginosa</i> Desf. ex. Ventenat.                                       |                              |                                 | Jousselin et al. 2003. | Jousselin et al. 2003. |
| <i>F. triradiata</i> Corner.                                                   | Hind & Herscovitch 6409 (K). | QLD, Australia.                 | AY730117               | AY730207               |
| <i>F. watkinsiana</i> F. M. Bailey.                                            | Rønsted 83 (C).              | Liv. col. (C). S1959-1912.      | AY730118               | AY730208               |
| Section <i>Americana</i>                                                       |                              |                                 |                        |                        |
| <i>F. albert-smithii</i> Standl.                                               | Rønsted 105 (K).             | Liv. col. (BG). Berg 89.519.    | AY730069               | AY730157               |
| <i>F. americana</i> Aubl.                                                      | Rønsted 154 (K).             | Liv. col. (BG). Berg 1994.0678. | AY730070               | AY730158               |
| <i>F. americana</i> Aubl.                                                      | Oyama.                       | Oaxaca, Mexico.                 | AY730087               | AY730175               |

|                                                                   |                  |                                    |          |          |
|-------------------------------------------------------------------|------------------|------------------------------------|----------|----------|
| (= <i>F. perforata</i> L.)                                        |                  |                                    |          |          |
| <i>F. americana</i> Aubl.                                         | Oyama            | Veracruz, Mexico.                  | AY730078 | AY730166 |
| (= <i>F. eugeniifolia</i> (Liebm.) Hemsl.).                       |                  |                                    |          |          |
| <i>F. andicola</i> Standl.                                        | Rønsted 145 (K). | Liv. col. (BG). Berg<br>1993.1675. | AY730071 | AY730159 |
| <i>F. broadwayi</i> Urb.                                          | Rønsted 121 (K). | Liv. col. (BG). Berg 89.522.       | AY730072 | AY730160 |
| <i>F. caballina</i> Standl.                                       | Rønsted 101 (K). | Liv. col. (BG). Berg 92.9222.      | AY730073 | AY730161 |
| <i>F. calimana</i> Dugand.                                        | Rønsted 108 (K). | Liv. col. (BG). Berg 89.540.       | AY730074 | AY730162 |
| <i>F. quichuana</i> C. C. Berg<br>(provisional name)              | Rønsted 149 (K). | Liv. col. (BG). Berg<br>1998.0266. | AY730075 | AY730163 |
| <i>F. cestrifolia</i> Schott.                                     | Rønsted 139 (K). | Liv. col. (BG). Berg.              | AY730076 | AY730164 |
| <i>F. citrifolia</i> Miller                                       | Rønsted 112 (K). | Liv. col. (BG). Berg 89.537.       | AY730077 | AY730165 |
| <i>F. crocata</i> (Miq.) Miq.<br>(= <i>F. goldmanii</i> Standl.). | Rønsted 92 (C).  | Liv. col. (C). P1985-5199.         | AY730080 | AY730168 |

|                                                                    |                  |                                    |                        |                        |
|--------------------------------------------------------------------|------------------|------------------------------------|------------------------|------------------------|
| <i>F. eximia</i> Schott.                                           | Rønsted 146 (K). | Liv. col. (BG). Berg<br>2000.1295. | AY730079               | AY730167               |
| <i>F. gomelleira</i> Kunth & Bouché.                               | Rønsted 153 (K). | Liv. col. (BG). Berg<br>2000.0831. | AY730081               | AY730169               |
| <i>F. luschnatiana</i> (Miq.) Miq.                                 | Rønsted 151 (K). | Liv. col. (BG). Berg<br>1999.1019. | AY730082               | AY730170               |
| <i>F. luschnatiana</i> (Miq.) Miq.<br>(= <i>F. monckii</i> Hassl). | Rønsted 78 (C).  | Liv. col. (C). S1947-0243.         | AY730083               | AY730171               |
| <i>F. nymphaeifolia</i> Mill.                                      |                  |                                    | Jousselin et al. 2003. | Jousselin et al. 2003. |
| <i>F. obtusifolia</i> Kunth.                                       | Rønsted 147 (K). | Liv. col. (BG). Berg<br>1999.0067. | AY730084               | AY730172               |
| <i>F. palmeri</i> S. Watson.                                       | Rønsted 93 (C).  | Liv. col. (C). P1975-5743.         | AY730085               | AY730173               |
| <i>F. paraensis</i> Miq.                                           | Rønsted 107 (K). | Liv. col. (BG). Berg 89.527.       | AY730086               | AY730174               |
| <i>F. pertusa</i> L.                                               | Rønsted 135 (K). | Liv. col. (BG). Berg 89.529.       | Weiblen 2000.          | AY730176               |
| <i>F. petiolaris</i> Kunth.                                        | Rønsted 94 (C).  | Liv. col. (C). P1994-5326.         | AY730088               | AY730177               |



|                                          |                        |                              |                        |                        |
|------------------------------------------|------------------------|------------------------------|------------------------|------------------------|
| <i>F. schippii</i> Standl.               | Neill et al. 6509 (K). | Napo prov., Ecuador.         | AY730089               | AY730178               |
| <i>F. schumacheri</i> (Liebm.) Griseb.   |                        |                              | Jousselin et al. 2003. | Jousselin et al. 2003. |
| Section <i>Galglychia</i> (Gasp.) Endl.  |                        |                              |                        |                        |
| <i>F. abutilifolia</i> (Miq.) Miq.       | Forest 326 (NBG).      | Liv. col. (NBG). 508-77.     | AY730091               | AY730180               |
| <i>F. burkei</i> (Miq.) Miq.             | Forest 345 (NBG).      | Liv. col. (NBG). 509-77.     | AY730095               | AY730184               |
| (= <i>F. thonningii</i> Bl.).            |                        |                              |                        |                        |
| <i>F. craterostoma</i> Mildbr. & Burret. | Forest 340 (NBG).      | Liv. col. (NBG). 46-79.      | AY730097               | AY730186               |
| <i>F. cyathistipuloides</i> De Wild.     |                        |                              | Jousselin et al. 2003. | Jousselin et al. 2003. |
| <i>F. elasticoides</i> De Wild.          | Rønsted 128 (K).       | Liv. col. (BG). Berg 94.426. | AY730103               | AY730192               |
| <i>F. fischeri</i> Mildbr. & Burret      | Forest 327 (NBG).      | Liv. col. (NBG).             | AY730098               | AY730187               |
| (= <i>F. kiloneura</i> Hornby).          |                        |                              |                        |                        |
| <i>F. glumosa</i> Delile.                |                        |                              | Jousselin et al. 2003. | Jousselin et al. 2003. |
| <i>F. lingua</i> De Wild. & T. Durand.   | Forest 325 (NBG).      | Liv. col. (NBG).             | AY730099               | AY730188               |
| <i>F. lingua</i> Warb. ex De Wild. &     | Rønsted 67 (C).        | Liv. col. (C). P1967-5449.   | AY730096               | AY730185               |

|                                                                         |                          |                               |                        |                        |  |
|-------------------------------------------------------------------------|--------------------------|-------------------------------|------------------------|------------------------|--|
| Durand ssp. <i>lingua</i> (= <i>F. buxifolia</i><br>De Wild.).          |                          |                               |                        |                        |  |
| <i>F. lutea</i> Vahl.                                                   |                          |                               | Jousselin et al. 2003. | Jousselin et al. 2003. |  |
| <i>F. lyrata</i> Warb.                                                  | Rønsted 85 (C).          | Living col. (C). P1909-5032.  | AY730104               | AY730193               |  |
| <i>F. natalensis</i> Hochst. ssp. <i>lepreurii</i><br>(Miq.) C.C. Berg. | Rønsted 75 (C).          | Living col. (C). P1958-5167.  | AY730100               | AY730189               |  |
| <i>F. ottonifolia</i> (Miq.) Miq. ssp.<br><i>macrocyce</i> C.C. Berg.   | Rønsted 117 (K).         | Liv. col. (BG). Berg 88.263.  | AY730109               | AY730198               |  |
| <i>F. petersii</i> Warb.<br>(= <i>F. thonningii</i> Bl.).               | Forest 352 (NBG).        | Liv. col. (NBG).              | AY730101               | AY730190               |  |
| <i>F. platyphylla</i> Delile.                                           | Chase 19854 (K).         | Living col. (K). 1995-106.    | AY730092               | AY730181               |  |
| <i>F. populifolia</i> Vahl.                                             | Thulin & Warfa 5542 (K). | Somalia.                      | AY730093               | AY730182               |  |
| <i>F. preussi</i> Warb.                                                 | Rønsted 138 (K).         | Liv. col. (BG). Berg 92.1123. | AY730105               | AY730194               |  |
| <i>F. sagittifolia</i> Mildbr. & Burret.                                | Chase 19852 (K).         | Liv. col. (K). K1986-3423.    | AY730106               | AY730195               |  |

|                                      |                   |                              |                        |                        |
|--------------------------------------|-------------------|------------------------------|------------------------|------------------------|
| <i>F. sansibarica</i> Warb.          | Rønsted 127 (K).  | Liv. col. (BG). Berg 88.271. | AY730110               | AY730199               |
| <i>F. saussureana</i> DC.            | Chase 19853 (K).  | Liv. col. (K). K1986-3421    | AY730090               | AY730179               |
| <i>F. scasselatii</i> Pamp.          | Rønsted 110 (K).  | Liv. col. (BG). Berg 88.293. | AY730107               | AY730196               |
| <i>F. stuhlmannii</i> Warb.          | Forest 342 (NBG). | Liv. col. (NBG). 770-77.     | AY730094               | AY730183               |
| <i>F. thonningii</i> Bl.             | Forest 341 (NBG). | Liv. col. (NBG). 534/77.     | AY730102               | AY730191               |
| <i>F. tremula</i> Warb.              | Forest 331 (NBG). | Liv. col. (NBG). 544-87.     | AY730111               | AY730200               |
| <i>F. wildemaniana</i> Warb.         | Rønsted 66 (C).   | Liv. col. (C). P1950-5675.   | AY730108               | AY730197               |
| Sect. <i>Stilpnophyllum</i> Endl.    |                   |                              |                        |                        |
| <i>F. elastica</i> Roxb. ex. Hornem. |                   |                              | Jousselin et al. 2003. | Jousselin et al. 2003. |
| Subgenus <i>Ficus</i>                |                   |                              |                        |                        |
| Section <i>Ficus</i>                 |                   |                              |                        |                        |
| <i>F. deltoidea</i> Jack.            |                   |                              | Jousselin et al. 2003. | Jousselin et al. 2003. |
| <i>F. erecta</i> Thunb.              | Rønsted 134 (K).  | Liv. col. (BG). Berg 92.239. | AY730121               | AY730211               |
| <i>F. ischnopoda</i> Miq.            | Rønsted 175 (AU)  | Phang Nga, Thailand.         | AY730122               | AY730212               |

|                                                    |                          |                            |                        |                        |
|----------------------------------------------------|--------------------------|----------------------------|------------------------|------------------------|
| <i>F. johannis</i> Boiss. (= <i>F. carica</i> L.). | Rønsted 96 (C).          | Liv. col. (C). S1966-0166. | AY730123               | AY730213               |
| <i>F. oleifolia</i> King.                          | Erwin & Paul S27470 (K). | Sarawak, Indonesia.        | AY730124               | -                      |
| <i>F. palmata</i> Forssk.                          | FB/S2786 (BR)            | Liv. col. (BR).            | AY730125               | AY730214               |
| Section <i>Eriosyceae</i> Miq.                     |                          |                            |                        |                        |
| <i>F. aurata</i> Miq.                              |                          |                            | Jousselin et al. 2003. | -                      |
| <i>F. chartacea</i> King.                          | Rønsted 177 (AU).        | Phang Nga, Thailand        | AY730126               | -                      |
| <i>F. grossularioides</i> Burm.                    |                          |                            | Weiblen 2000.          | Jousselin et al. 2003. |
| <i>F. hirta</i> Vahl.                              | Rønsted 168 (AU).        | Phuket, Thailand.          | AY730127               | -                      |
| <i>F. padana</i> Burm.                             |                          |                            | Weiblen 2000.          | -                      |
| Subgenus <i>Synoecia</i> (Miq.) Miq.               |                          |                            |                        |                        |
| Section <i>Kissosyceae</i> Miq.                    |                          |                            |                        |                        |
| <i>F. punctata</i> Thunb.                          |                          |                            | Weiblen 2000.          | Jousselin et al. 2003. |
| <i>F. ruginervia</i> Corner                        |                          |                            | Weiblen 2000.          | -                      |
| Section <i>Rhizocladus</i> Endl.                   |                          |                            |                        |                        |

|                                                                 |                        |                           |                        |
|-----------------------------------------------------------------|------------------------|---------------------------|------------------------|
| <i>F. baeuerlenii</i> King.                                     | Weiblen 2000.          | -                         |                        |
| <i>F. diversiformis</i> Miq.                                    | Samuel 3100 (K).       | Kitugala, Sri Lanka.      | AY730215               |
| <i>F. jimnensis</i> C. C. Berg<br>(= <i>F. nasuta</i> Summerh.) | Weiblen 792 (A/LAE)    | New Guinea                | AY730216               |
| <i>F. odoardi</i> King.                                         | Weiblen 2000.          | -                         | -                      |
| <i>F. pumila</i> L.                                             | Jousselin et al. 2003. | Jousselin et al. 2003.    | Jousselin et al. 2003. |
| <i>F. villosa</i> Bl.                                           | Chase 19851 (K).       | Liv. col. K1984-2930.     | AY730130<br>AY730217   |
| Subgenus <i>Sycidium</i> (Miq.) Mildbr. &<br>Burret             |                        |                           |                        |
| Section <i>Sycidium</i> Miq.                                    |                        |                           |                        |
| <i>F. asperifolia</i> Miq.                                      | Jousselin et al. 2003. | Jousselin et al. 2003.    | Jousselin et al. 2003. |
| <i>F. conocephalifolia</i> Ridley.                              | Weiblen 2000.          | -                         | -                      |
| <i>F. copiosa</i> Steud.                                        | Weiblen 2000.          | -                         | -                      |
| <i>F. coronata</i> Spin.                                        | Rønsted 71 (C).        | Liv. col. (C). S1953-2381 | AY730131<br>AY730218   |

|                                         |                            |                              |                         |                         |
|-----------------------------------------|----------------------------|------------------------------|-------------------------|-------------------------|
| <i>F. gul</i> Laut et K. Schum.         | Takeuchi et al. 15019 (K). | New Guinea.                  | AY730132                | AY730219                |
| <i>F. lateriflora</i> Vahl.             |                            |                              | Jousselein et al. 2003. | Jousselein et al. 2003. |
| <i>F. parietalis</i> Bl.                |                            |                              | Jousselein et al. 2003. | Jousselein et al. 2003. |
| <i>F. phaeosyce</i> Laut et K. Schum.   |                            |                              | Weiblen 2000.           | -                       |
| <i>F. pygmaea</i> Hiern.                | Forest 332 (NBG).          | Liv. col. (NBG).             | AY730134                | AY730221                |
| <i>F. wassa</i> Roxb.                   |                            |                              | Weiblen 2000.           | -                       |
| Section <i>Paleomorphe</i> King.        |                            |                              |                         |                         |
| <i>F. heteropleura</i> Bl.              | Rønsted 165 (AU).          | Phang Nga, Thailand.         | AY730133                | AY730220                |
| <i>F. parietalis</i> Bl.                |                            |                              | Jousselein et al. 2003. | Jousselein et al. 2003. |
| <i>F. sinuata</i> Thunb.                | Rønsted 70 (C).            | Liv. col. (C). P1972-5164.   | AY730135                | AY730222                |
| <i>F. tinctoria</i> Forst. f.           | Rønsted 99 (K).            | Liv. col. (BG). Berg 89.551. | Weiblen 2000.           | AY730223                |
| <i>F. virgata</i> Reinw. ex. Bl.        | Rønsted 65 (C).            | Liv. col. (C). P1986-5148.   | Weiblen 2000.           | AY730224                |
| Subgenus <i>Sycomorvus</i> (Gasp.) Miq. |                            |                              |                         |                         |
| Section <i>Adenosperma</i> Corner.      |                            |                              |                         |                         |

|                                                                       |                        |                             |
|-----------------------------------------------------------------------|------------------------|-----------------------------|
| <i>F. adenosperma</i> Miq.                                            | Weiblen 2000.          | -                           |
| <i>F. ochrochlora</i> Ridley.                                         | Weiblen 2000.          | -                           |
| Section <i>Dammaropsis</i> (Warb.) C. C. Berg                         |                        |                             |
| <i>F. dammaropsis</i> Diels.                                          | Weiblen 2000.          | -                           |
| Section <i>Sycomorus</i> subsect. <i>Sycomorus</i> .                  |                        |                             |
| <i>F. mauritiana</i> Lam.                                             | Jousselin et al. 2003. | Jousselin et al. 2003.      |
| <i>F. mucoso</i> Ficalho.                                             | Rønsted 129 (K).       | Liv. col. (BG). Berg 93.96. |
| <i>F. sur</i> Forssk.                                                 | Weiblen 2000.          | AY730210                    |
| <i>F. sycomorus</i> L.                                                | Jousselin et al. 2003. | Jousselin et al. 2003.      |
| <i>F. vallis-chaudae</i> Delille.                                     | Jousselin et al. 2003. | Jousselin et al. 2003.      |
| Section <i>Sycomorus</i> subsect. <i>Neomorphe</i> (King) C. C. Berg. |                        |                             |
|                                                                       | Jousselin et al. 2003. | Jousselin et al. 2003.      |

|                                    |                        |                                                |
|------------------------------------|------------------------|------------------------------------------------|
| <i>F. auriculata</i> Lour.         | Weiblen 2000.          | -                                              |
| <i>F. nodosa</i> Teysm. et. Binn.  | Weiblen 2000.          | -                                              |
| <i>F. robusta</i> Corner.          | Weiblen 2000.          | -                                              |
| <i>F. variegata</i> Bl.            | Weiblen 2000.          | Jousselin et al. 2003.                         |
| Section <i>Sycocarpus</i> Miq.     |                        |                                                |
| <i>F. bernaysii</i> King.          | Weiblen 2000.          | -                                              |
| <i>F. condensata</i> King.         | Jousselin et al. 2003. | Jousselin et al. 2003.                         |
| <i>F. congesta</i> Roxb.           | Weiblen BO1 (A/MIN).   | New Guinea. AY730136 AY730225                  |
| <i>F. fistulosa</i> Reinw. ex. Bl. | Rønsted 111 (K).       | Liv. col. (BG). Berg 88.286. AY730137 AY730226 |
| <i>F. hispidioides</i> S. Moore.   | Weiblen B2 (MIN).      | New Guinea. Weiblen 2000. AY730227             |
| <i>F. lepigarpa</i> Bl.            | Rønsted 162 (AU).      | Ranong, Thailand. AY730138 -                   |
| <i>F. scortechinii</i> King        | Rønsted 167 (AU).      | Phuket, Thailand. AY730139 AY730228            |
| <i>F. septica</i> Burm. f.         | Weiblen 836 (HON).     | New Guinea. Weiblen 2000. AY730229             |
| <i>F. uncinata</i> King.           | Jousselin et al. 2003. | Jousselin et al. 2003.                         |



| Outgroups                              |                             |                            |          |          |
|----------------------------------------|-----------------------------|----------------------------|----------|----------|
| <i>Antiaropsis decipiens</i> K. Schum. | Weiblen 1233 (MIN).         | New Guinea.                | AY730142 | -        |
| <i>Castilla elastica</i> Sess.         | Chase 19850 (K).            | Liv. col. (K). K1986-3013. | AY730143 | AY730232 |
| <i>Poulsenia armata</i> (Miq.) Standl. | Pennington et al. 1460 (K). | Ecuador.                   | AY730144 | AY730233 |
| <i>Sparattosyce dioica</i> Bur.        | Weiblen 1223 (MIN).         | New Caledonia              | AY730141 | AY730231 |

Classification of *Ficus* according to Berg (1989, *Experientia* 45) and (2003-2004, *Blumea* 48-49). For voucher information on previously published sequences, see reference cited with sequence (Weiblen, G. D., 2000, *Am. J. Bot.* 87; Jousselein, E., et al. 2003, *Evolution* 57).

Fig sections Wasp genera

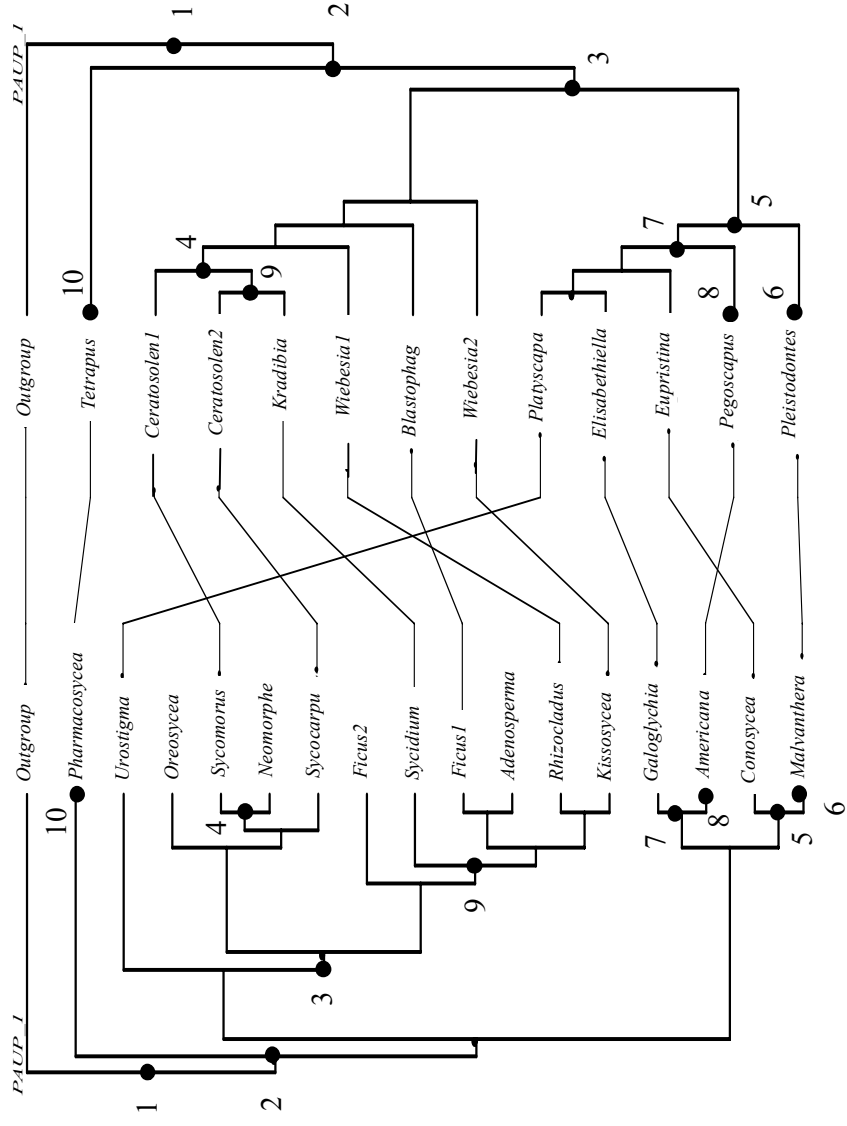

Tanglegram drawn with the program TreeMap (Page, R. D. M. 1995. TREEMAP program. Availability: <http://taxonomy.zoology.gla.ac.uk/rod/treemap.html>) of the association of figs (*Ficus spp.*) and their pollinating wasps (Agaoninae). Phylogenetic trees are summaries of the chronograms presented in figures 2 and 3. Fine lines connect fig sections with their specific genus of pollinating wasps. Ten interacting lineages of figs and pollinators are shown and numbered 1-10; these represent co-cladogenetic events across the phylogenetic tree of figs at the taxonomic level of sections and above: 1. *Ficus/Agaoninae* root nodes, 2. *Ficus/Agaoninae* crown groups, 3. Dioecious *Ficus*/associated pollinator stem lineages, 4. *Sycomorus s.s./associated Ceratosolen* stem lineages, 5. *Malvanthera/Pleistodontes* stem lineages, 6. *Malvanthera/Pleistodontes* crown groups, 7. *Americana/Pegoscapus* stem lineages, 8. *Americana/Pegoscapus* crown groups, 9. *Sycidium/Kradibia* plus *Lipporhopalum* stem lineages, 10. *Pharmacosycea/Tetrapus* crown lineages.
